# Supplementary material
Source: PubMed Central journal article supplement (PMC9055571)

**Fig. S1**

**A**

**0 h**

**22h**

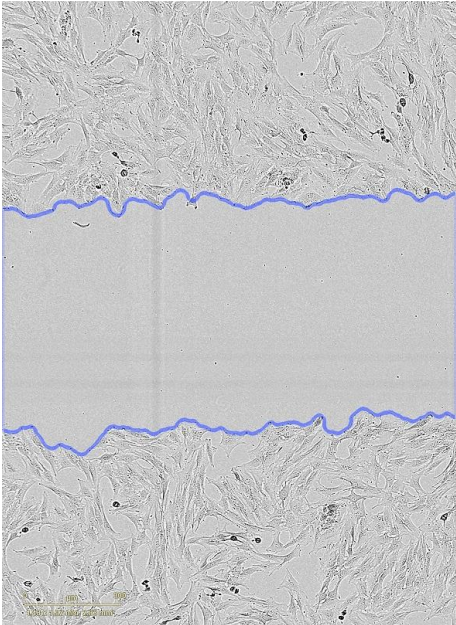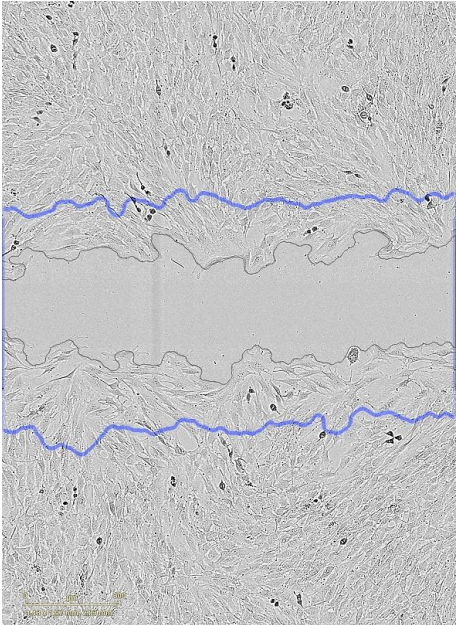

**B**

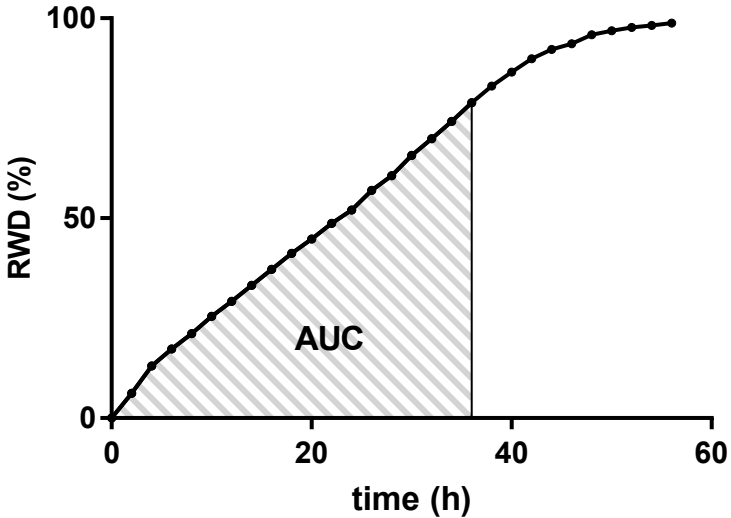

Supplement: NIHMS1002356-supplement-Supplementary_Data.pdf [file NIHMS1002356-supplement-Supplementary_Data.pdf]
